# Supplementary material for: Eunicellin-Based Diterpenoids, Hirsutalins N–R, from the Formosan Soft Coral Cladiella hirsuta
Source: MDPI journal article supplement (doi:10.3390/md12052446), 2014-04-30

## Supplementary Information

**Figure S1.** HREIMS spectrum of **1**

**Figure S2.**  $^1\text{H}$  NMR spectrum of **1** in  $\text{CDCl}_3$

**Figure S3.**  $^{13}\text{C}$  NMR spectrum of **1** in  $\text{CDCl}_3$

**Figure S4.** HREIMS spectrum of **2**

**Figure S5.**  $^1\text{H}$  NMR spectrum of **2** in  $\text{CDCl}_3$

**Figure S6.**  $^{13}\text{C}$  NMR spectrum of **2** in  $\text{CDCl}_3$

**Figure S7.** HREIMS spectrum of **3**

**Figure S8.**  $^1\text{H}$  NMR spectrum of **3** in  $\text{CDCl}_3$

**Figure S9.**  $^{13}\text{C}$  NMR spectrum of **3** in  $\text{CDCl}_3$

**Figure S10.** HREIMS spectrum of **4**

**Figure S11.**  $^1\text{H}$  NMR spectrum of **4** in  $\text{CDCl}_3$

**Figure S12.**  $^{13}\text{C}$  NMR spectrum of **4** in  $\text{CDCl}_3$

**Figure S13.** HREIMS spectrum of **5**

**Figure S14.**  $^1\text{H}$  NMR spectrum of **5** in  $\text{CDCl}_3$

**Figure S15.**  $^{13}\text{C}$  NMR spectrum of **5** in  $\text{CDCl}_3$

**Figure S1.** HREIMS spectrum of **1**.

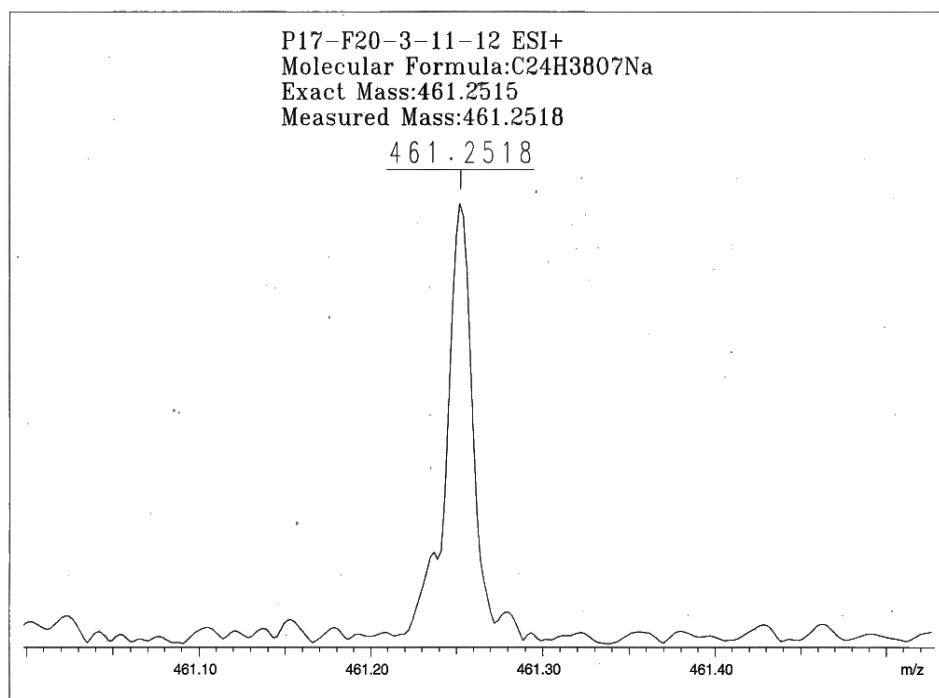

Figure S2.  $^1\text{H}$  NMR spectrum of **1** in  $\text{CDCl}_3$ .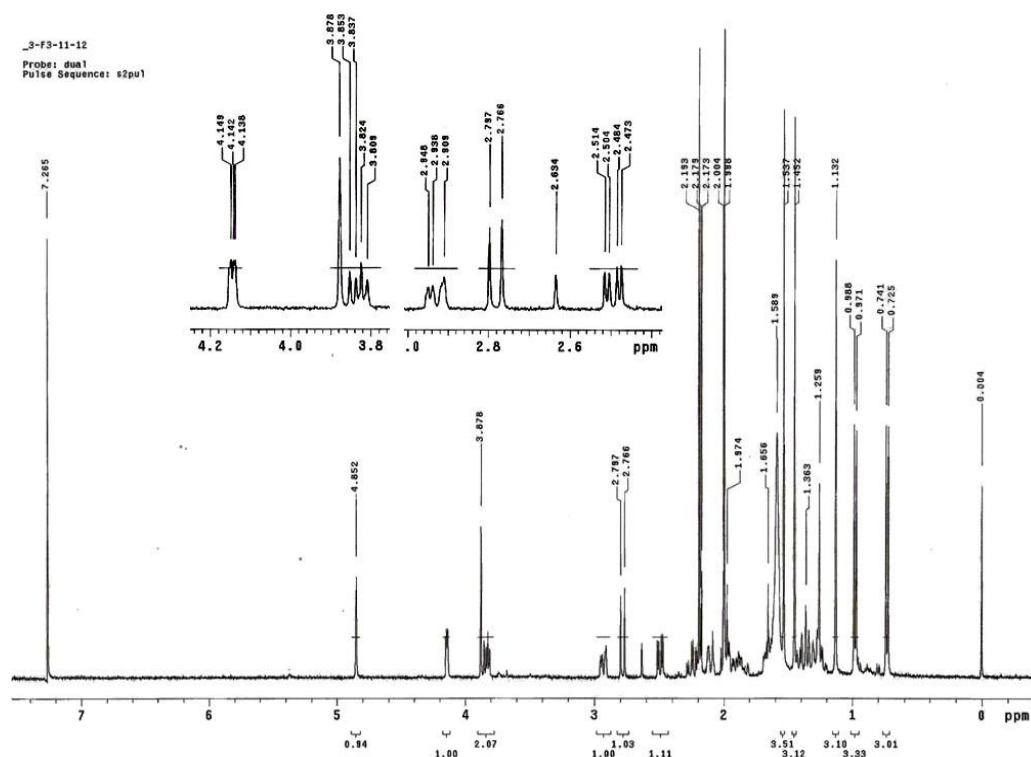Figure S3.  $^{13}\text{C}$  NMR spectrum of **1** in  $\text{CDCl}_3$ .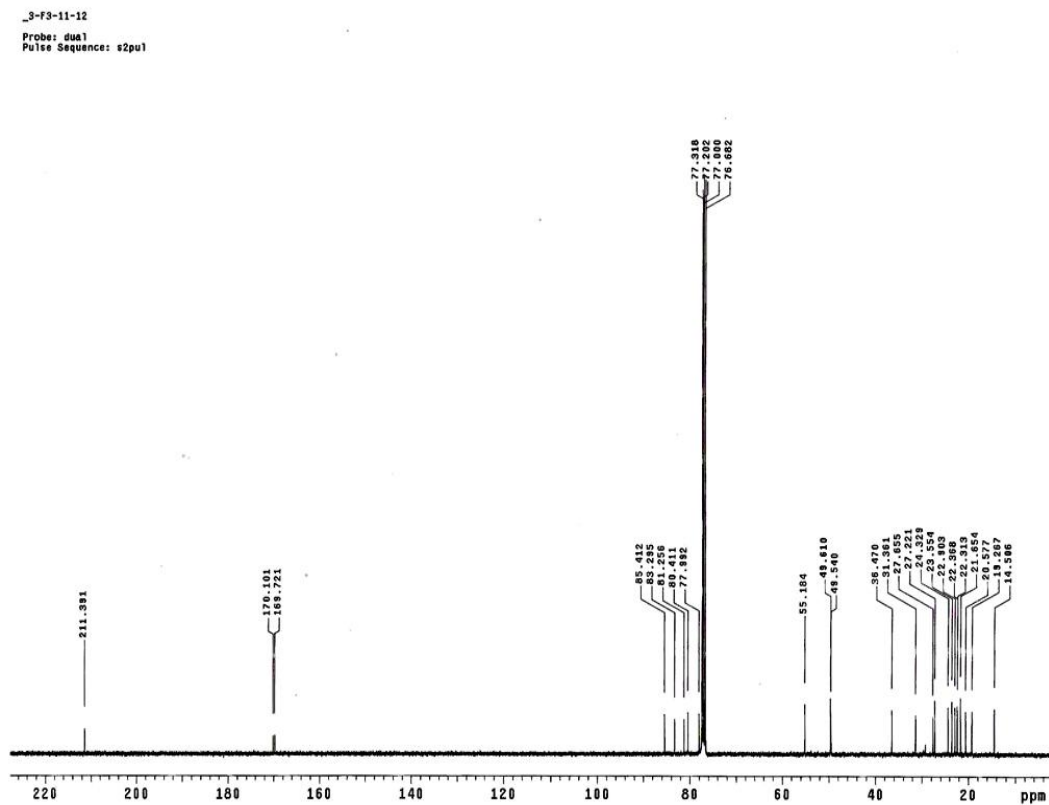

**Figure S4.** HREIMS spectrum of **2**.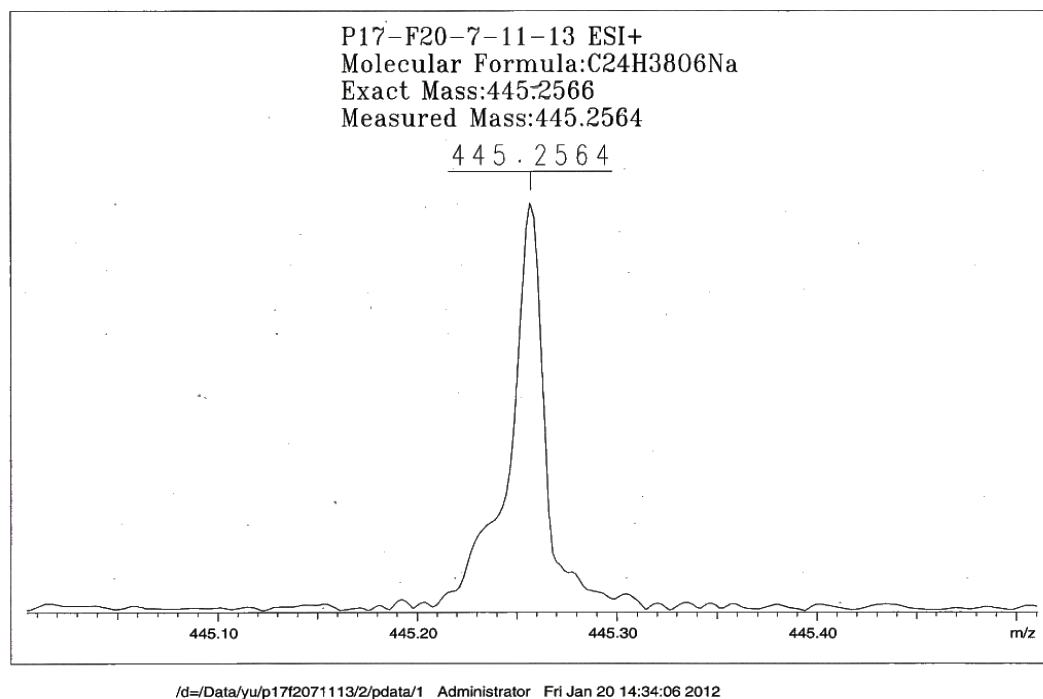**Figure S5.** <sup>1</sup>H NMR spectrum of **2** in CDCl<sub>3</sub>.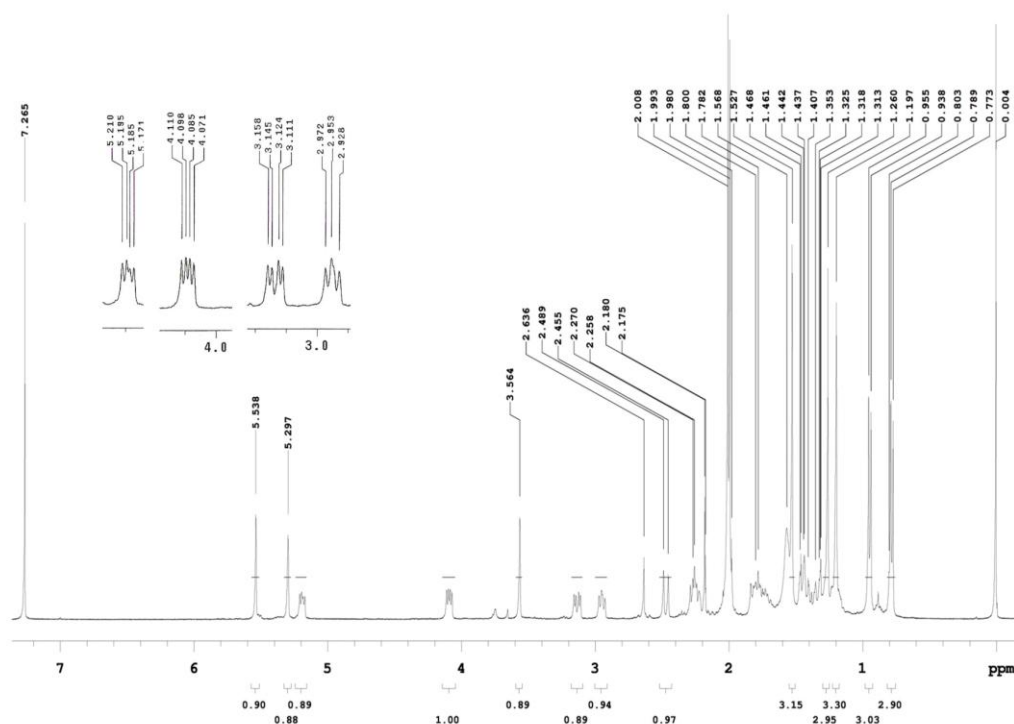

Figure S6.  $^{13}\text{C}$  NMR spectrum of 2 in  $\text{CDCl}_3$ .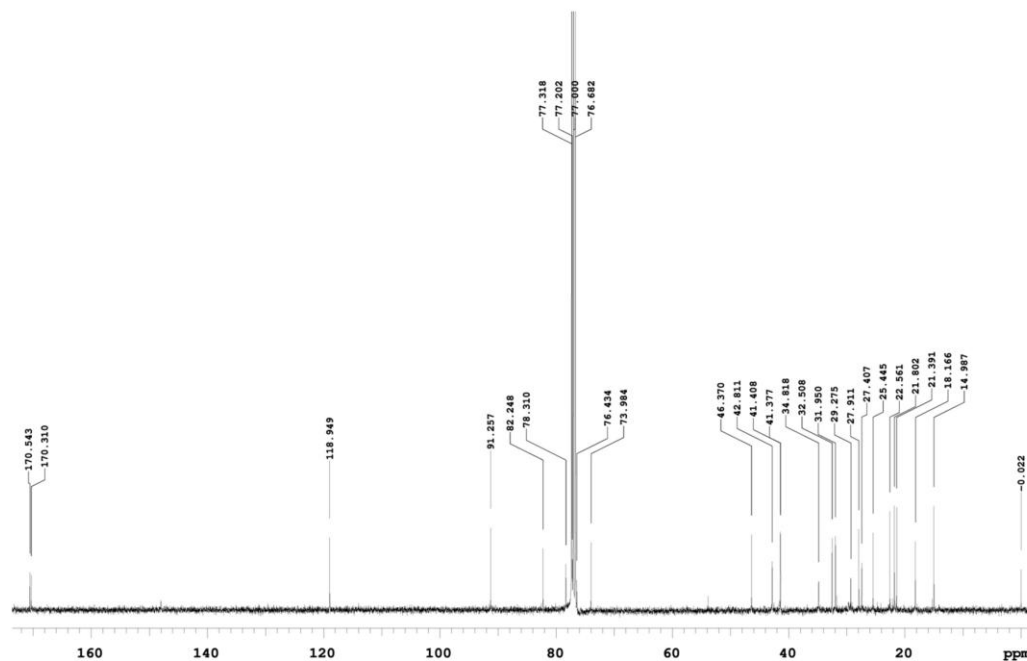

Figure S7. HREIMS spectrum of 3.

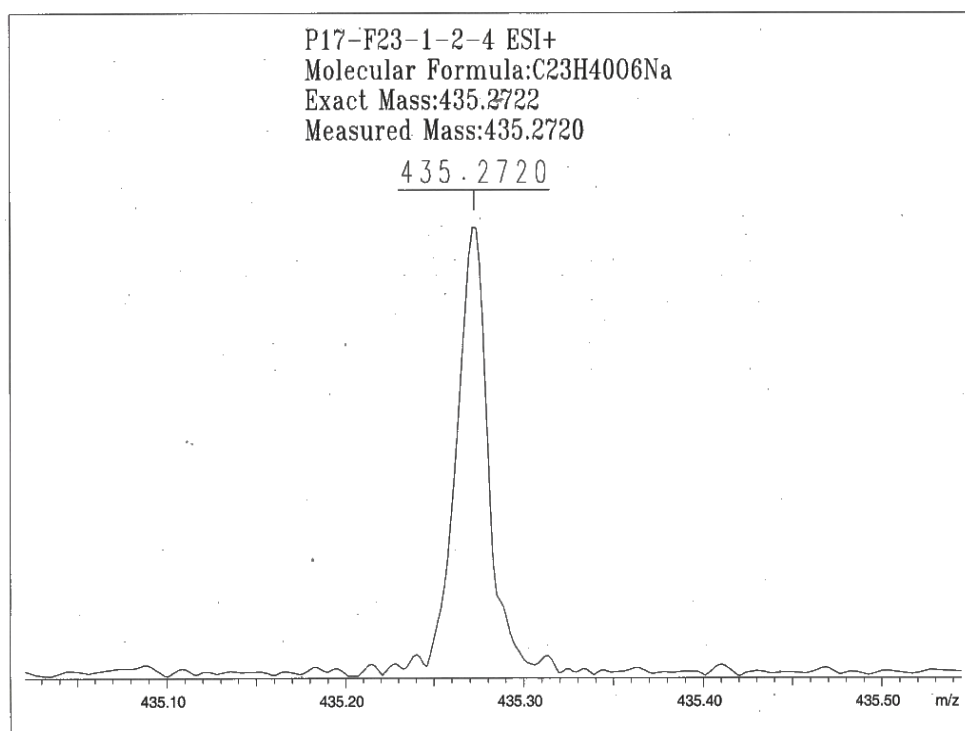

**Figure S8.**  $^1\text{H}$  NMR spectrum of **3** in  $\text{CDCl}_3$ .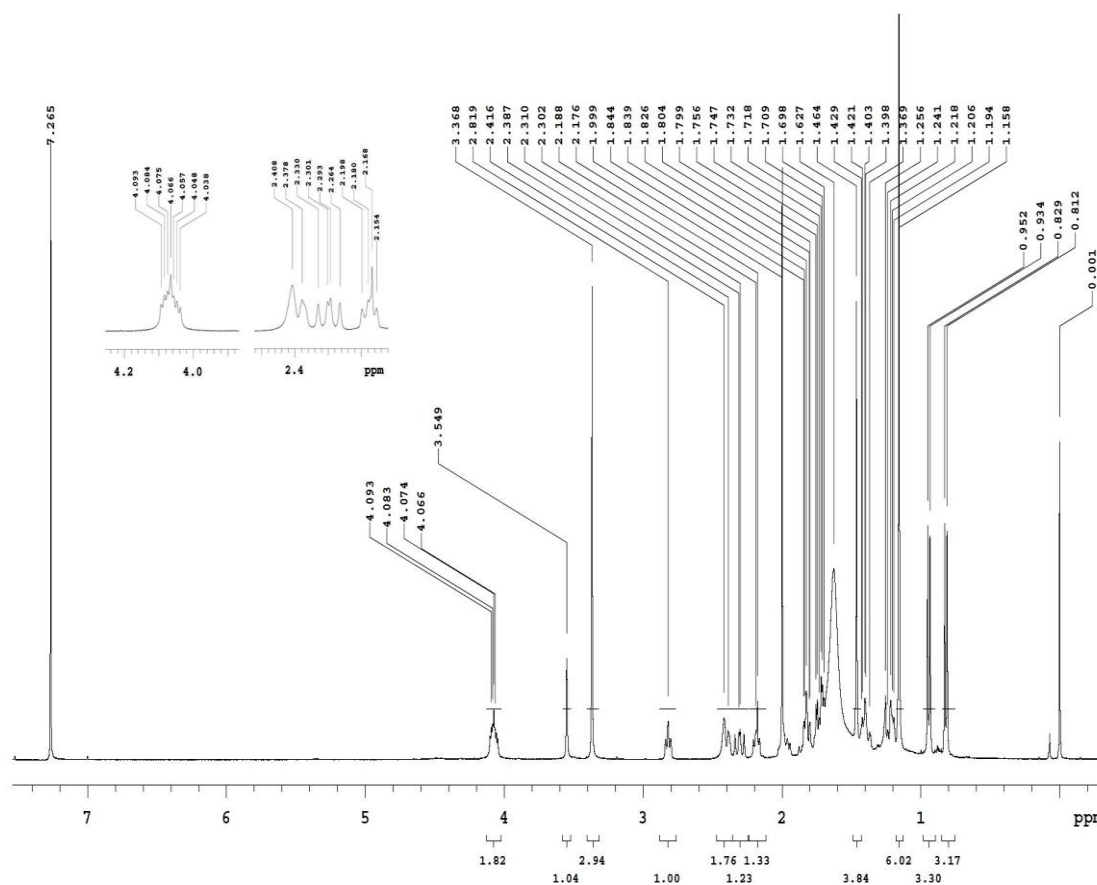**Figure S9.**  $^{13}\text{C}$  NMR spectrum of **3** in  $\text{CDCl}_3$ .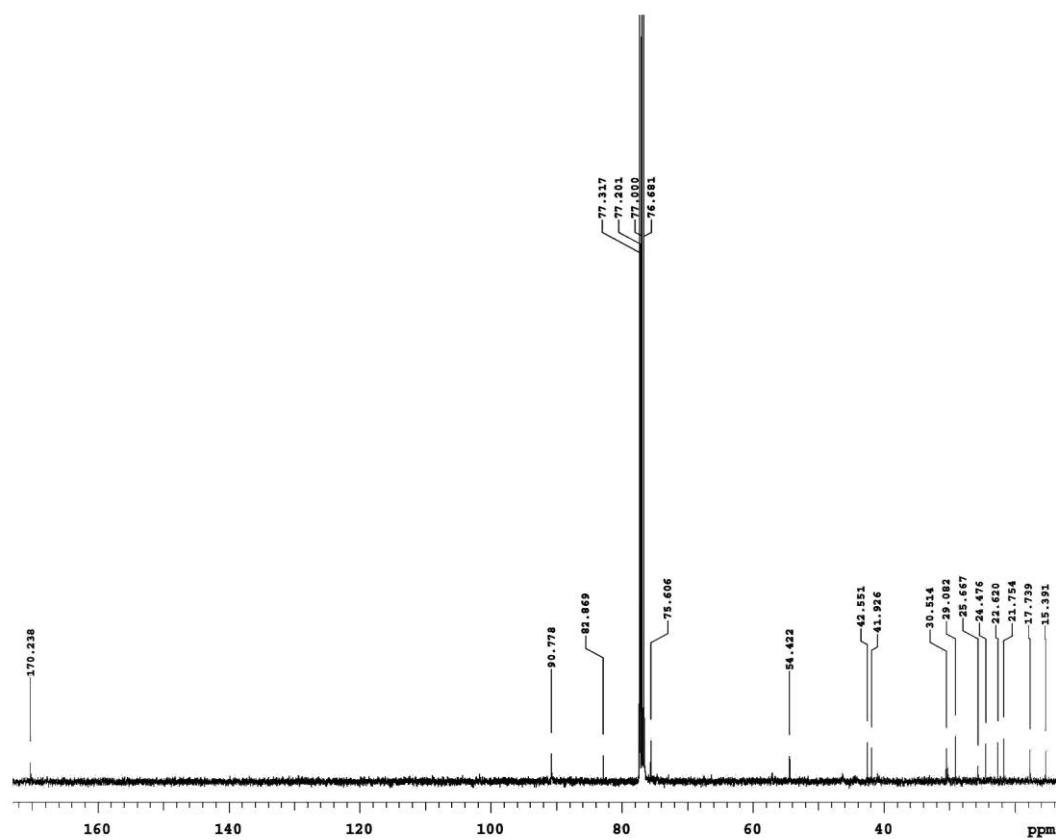

Figure S10. HREIMS spectrum of 4.

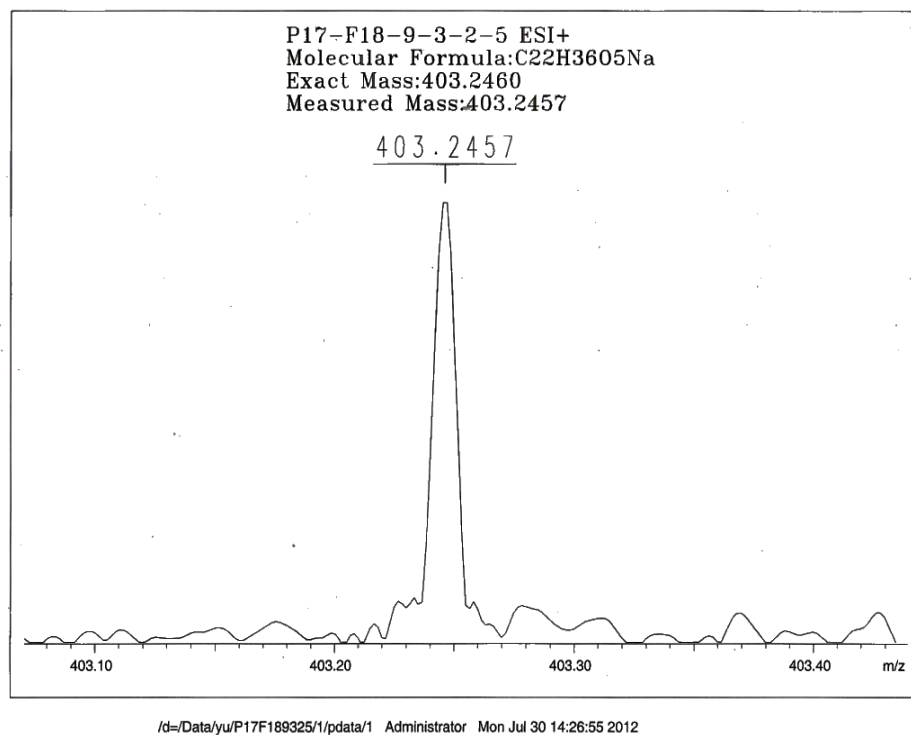Figure S11. <sup>1</sup>H NMR spectrum of 4 in CDCl<sub>3</sub>.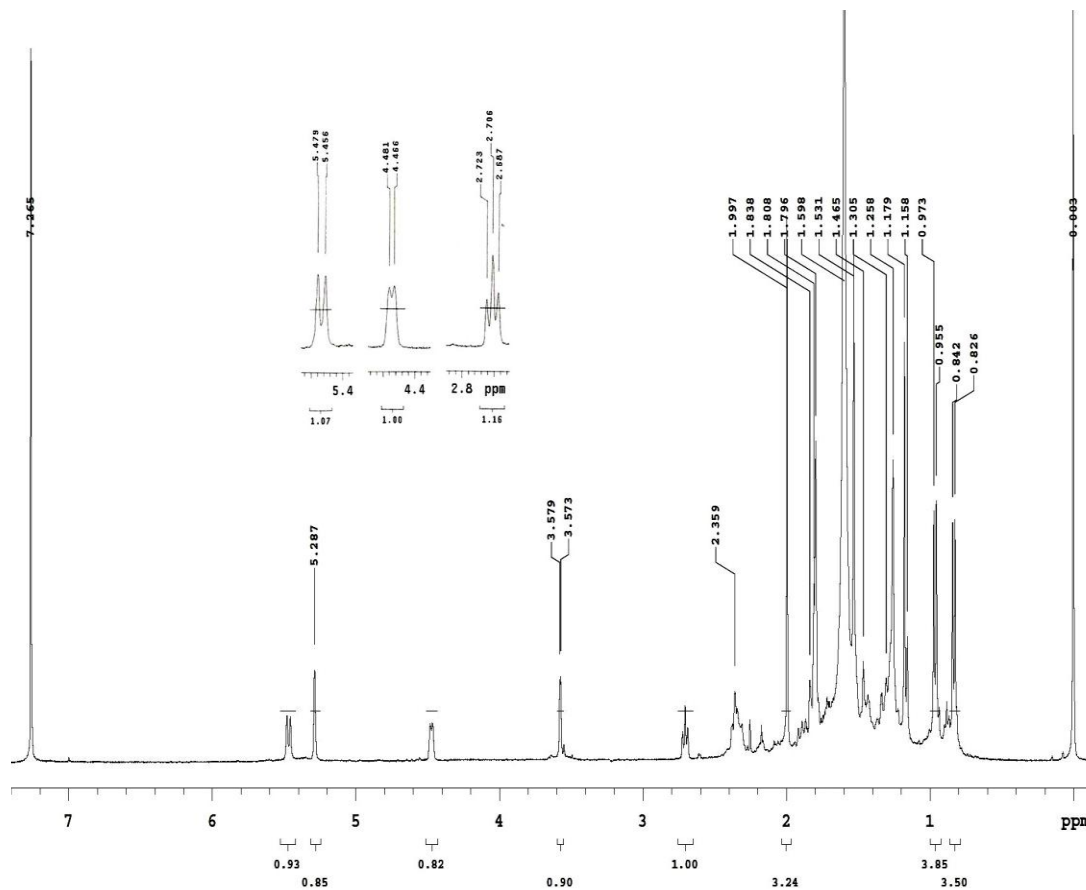

**Figure S12.**  $^{13}\text{C}$  NMR spectrum of **4** in  $\text{CDCl}_3$ .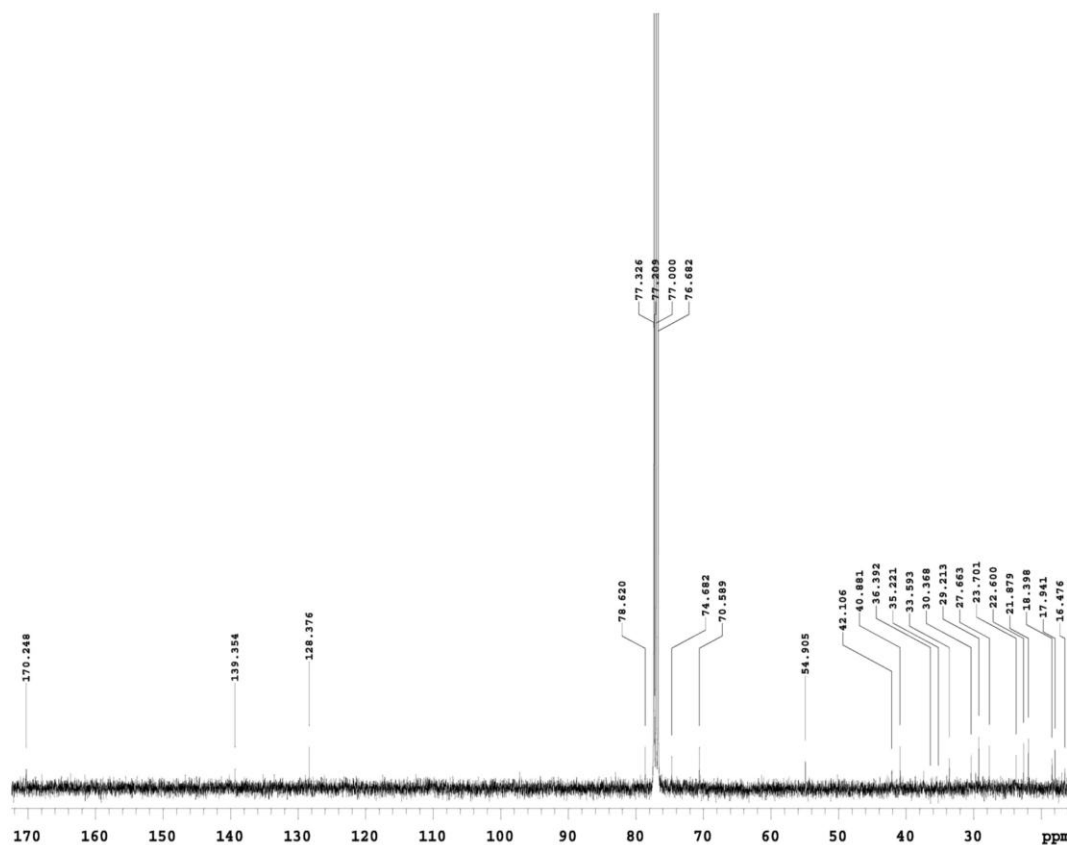**Figure S13.** HREIMS spectrum of **5**.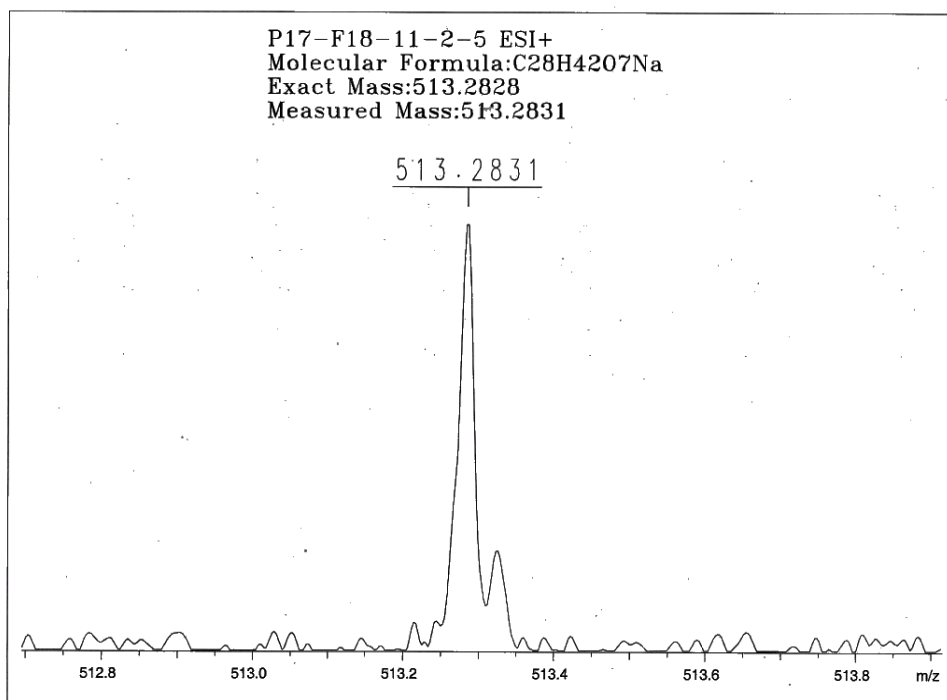

Figure S14.  $^1\text{H}$  NMR spectrum of **5** in  $\text{CDCl}_3$ .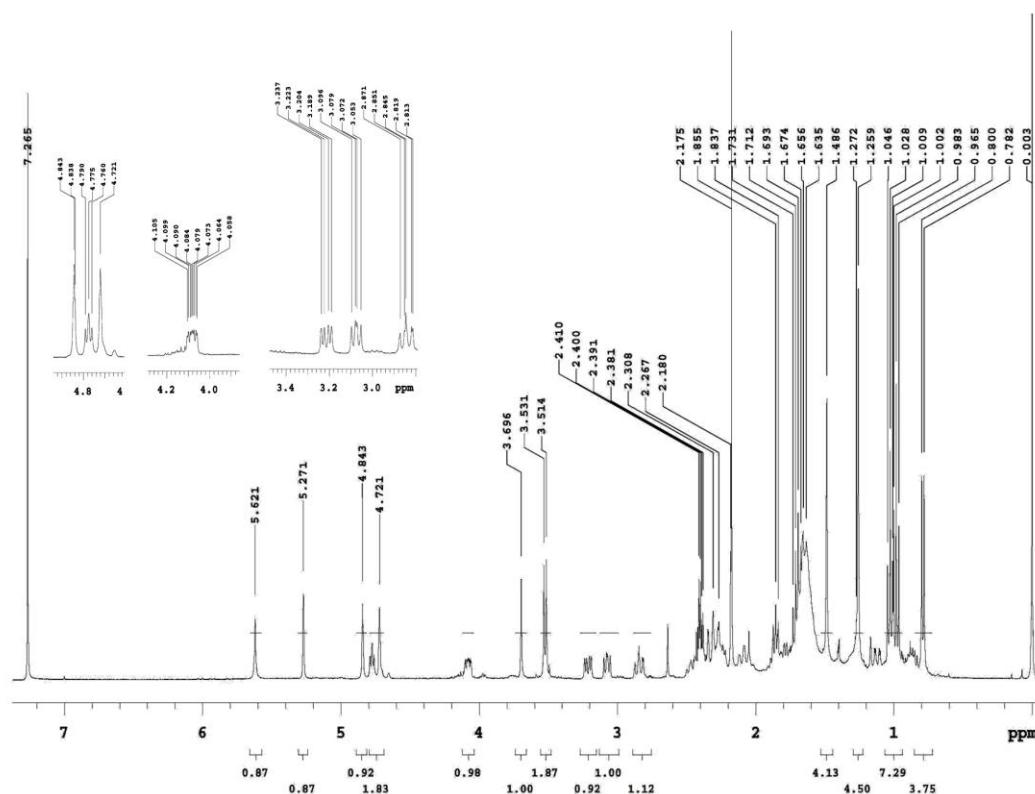Figure S15.  $^{13}\text{C}$  NMR spectrum of **5** in  $\text{CDCl}_3$ .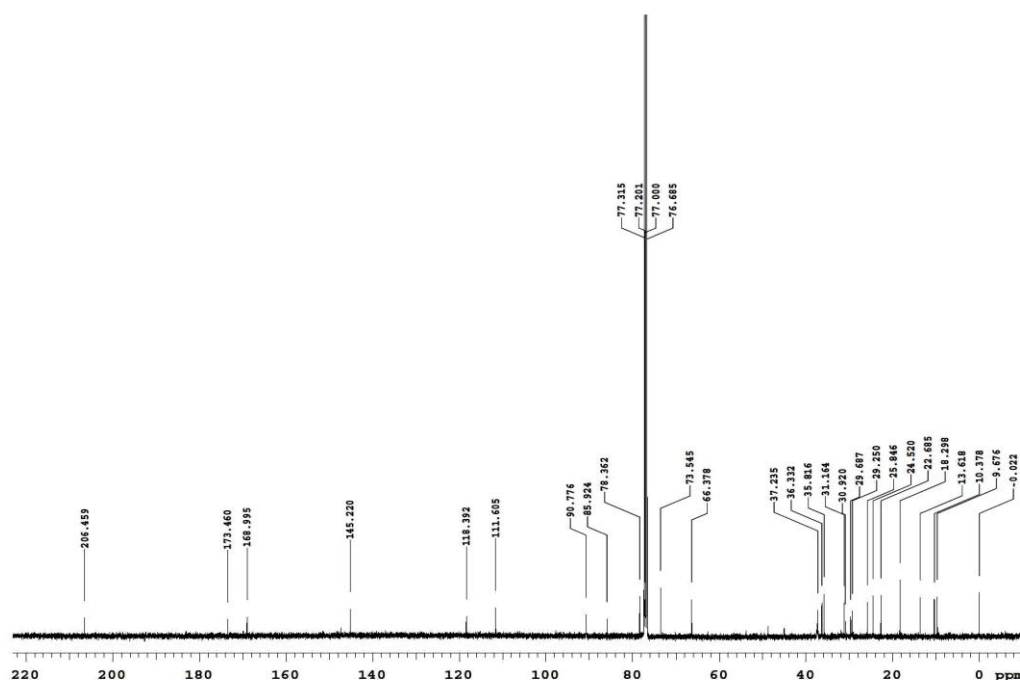

Supplement: s1 [file s1]
